# Supplementary material for: Three-dimensional carbon foam-metal oxide-based asymmetric electrodes for high-performance solid-state micro-supercapacitors
Source: Royal Society of Chemistry journal article supplement (doi:10.1039/d1nr02833b), 2021-01-01
Supplement: d1nr02833b1.pdf [file d1nr02833b1.pdf]

## Supporting information

### **Three-dimensional Carbon Foam-Metal Oxides based Asymmetric Electrodes for High-performance Solid-state Micro-Supercapacitor**

Sumana Kumar<sup>1</sup> and Abha Misra<sup>1\*</sup>

<sup>1</sup>Department of Instrumentation and Applied Physics, Indian Institute of Science, Bangalore,  
Karnataka 560012

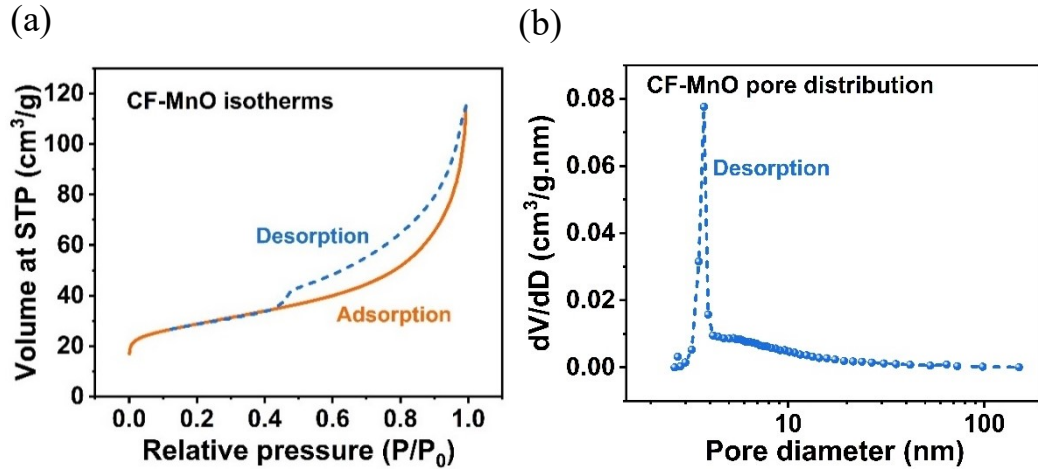

Figure S1: (a) Nitrogen adsorption-desorption isotherms for CF-MnO composite. (b) pore size distribution of CF-MnO composite.

Table S1: Calculated total specific surface area  $S_{\text{BET}}$ , total pore volume  $V_{\text{T}}$ , total micropore volume  $V_{\text{M}}$ , micropore surface area  $S_{\text{M}}$ , external surface area  $S_{\text{E}}$ , average pore diameter  $d_{\text{M}}$  for CF, and CF-MnO listed below.

|        | $S_{\text{BET}}$           | $V_{\text{T}}$              | $V_{\text{M}}$              | $S_{\text{M}}$             | $S_{\text{E}}$             | $d_{\text{M}}$ |
|--------|----------------------------|-----------------------------|-----------------------------|----------------------------|----------------------------|----------------|
|        | $\text{m}^2 \text{g}^{-1}$ | $\text{cm}^3 \text{g}^{-1}$ | $\text{cm}^3 \text{g}^{-1}$ | $\text{m}^2 \text{g}^{-1}$ | $\text{m}^2 \text{g}^{-1}$ | $\text{nm}$    |
| CF     | 209.3                      | 0.2916                      | 0.03                        | 63.39                      | 145.91                     | 5.574          |
| CF-MnO | 98.22                      | 0.1781                      | 0.0172                      | 35.9                       | 62.32                      | 9.224          |

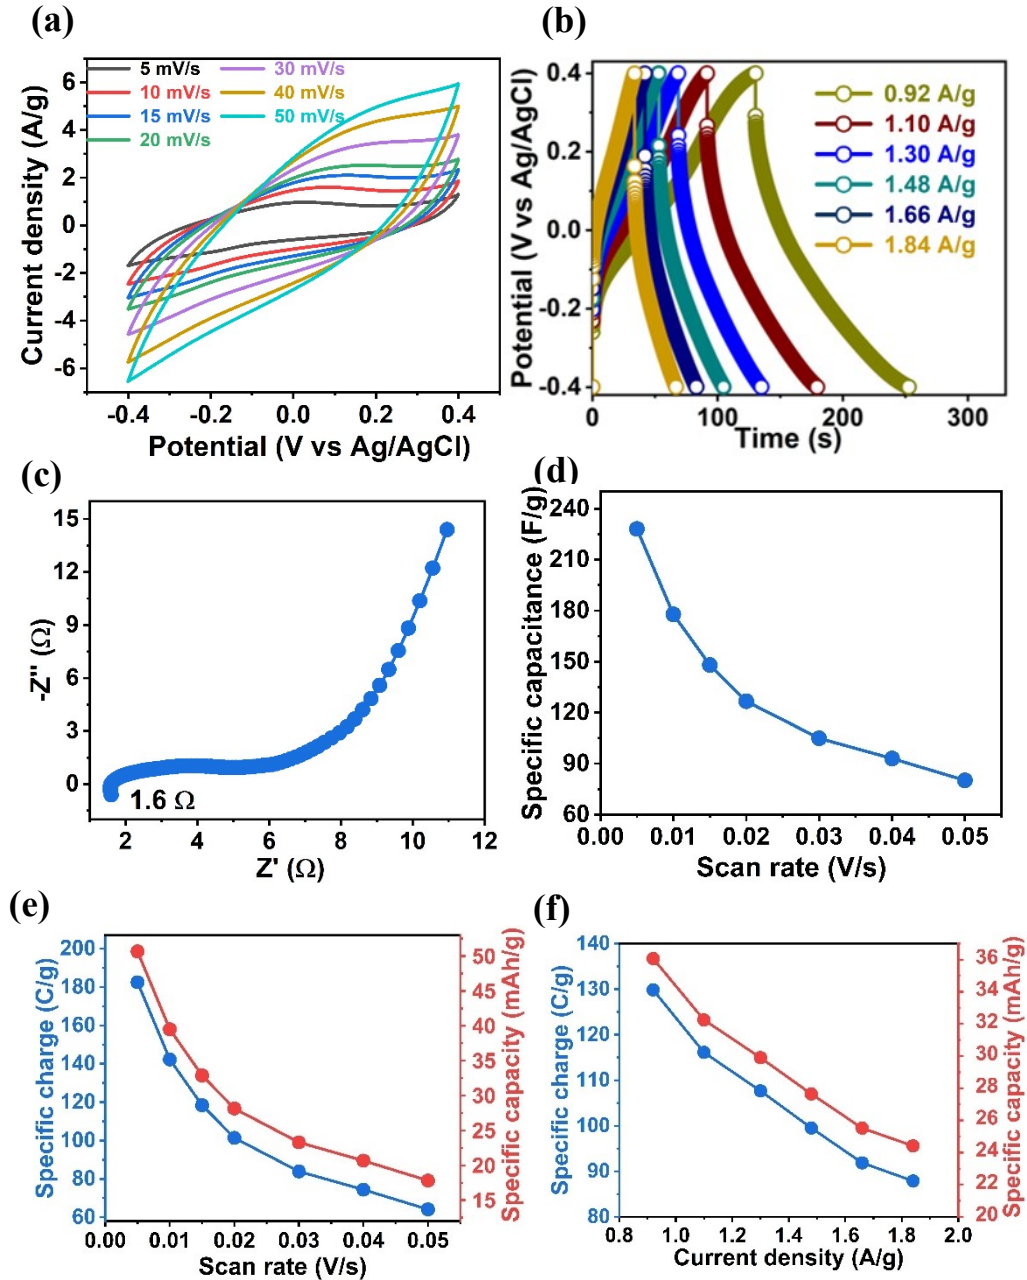

Figure S2: Electrochemical performance of positive electrode material in 6M KOH electrolyte. (a) *CV* curves of CF-MnO (3:1) electrode measured at different scan rates. (b) Galvanostatic charge-discharge curve of CF-MnO (3:1) electrode at various current densities. (c) Nyquist plot of CF-MnO (3:1) electrode. (d) The specific capacitance of CF-MnO (3:1) calculated from *CV* curves as a function of scan rates. (e) The specific charge and capacity of CF-MnO (3:1)

calculated from *CV* curves as a function of scan rates. (f) The specific charge and capacity of CF-MnO (3:1) calculated from *CD* curves as a function of current densities.

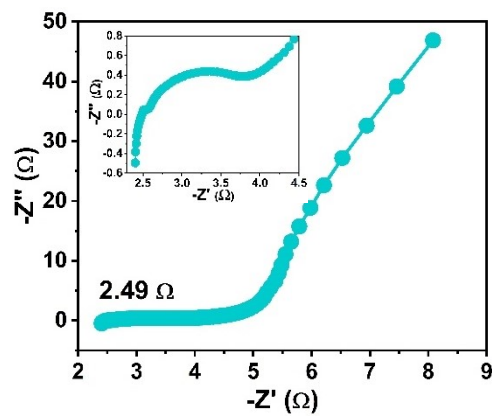

Figure S3: Nyquist plot of pristine CF electrode. Inset shows a magnified view in the high-frequency region.

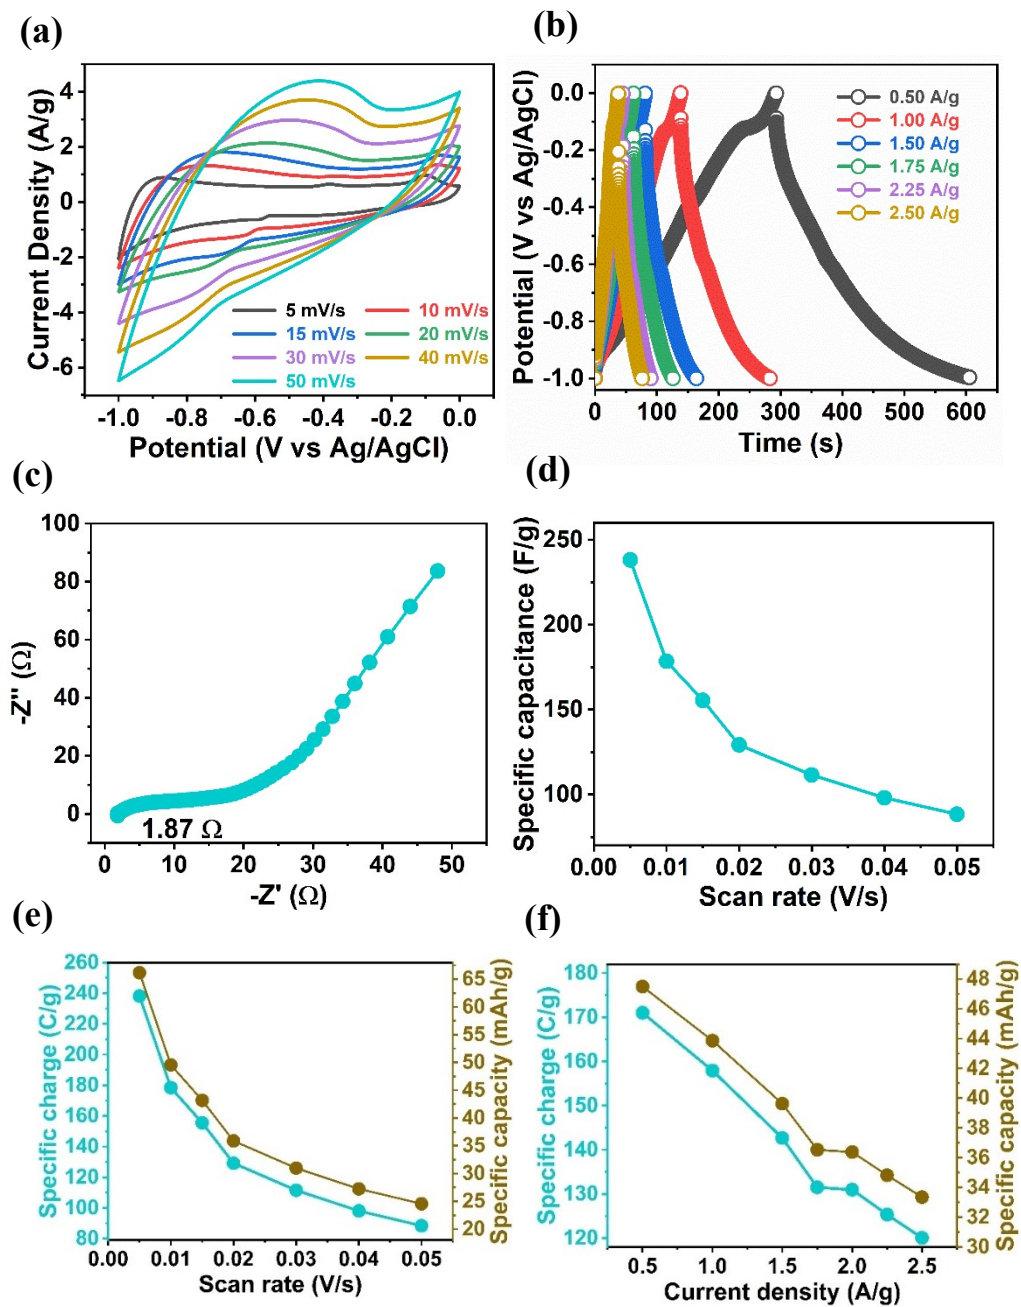

Figure S4: The electrochemical performance of negative electrode material in 6 M KOH electrolyte. a) CV curves of CF-Fe<sub>2</sub>O<sub>3</sub> (9:1) at various scan rates ranging from 5 to 50 mV/s. b) Galvanostatic charge-discharge curves of CF-Fe<sub>2</sub>O<sub>3</sub> (9:1) at different current densities. c) Nyquist plot of CF-Fe<sub>2</sub>O<sub>3</sub> (9:1) in the frequency ranging from 0.01 Hz to 1k Hz. d) Specific capacitance of CF-Fe<sub>2</sub>O<sub>3</sub> (9:1) calculated from CV curves as a function of scan rates. e) The specific charge and capacity of CF-Fe<sub>2</sub>O<sub>3</sub> (9:1) calculated from CV curves as a function of scan

rates. (f) The specific charge and capacity of CF-Fe<sub>2</sub>O<sub>3</sub> (9:1) calculated from *CD* curves as a function of current densities.

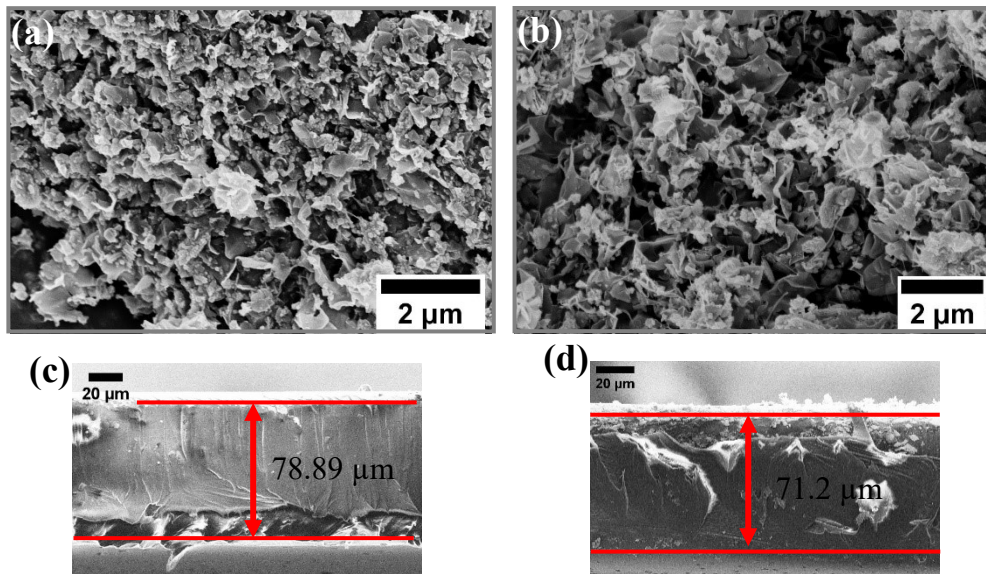

Figure S5: Morphological and structural characterization of spray printed asymmetric micro-supercapacitor. Top-view SEM image of (a) CF-Fe<sub>2</sub>O<sub>3</sub> coated negative microelectrodes, (b) CF-MnO coated positive microelectrodes. Cross-sectional SEM image of (c) CF-Fe<sub>2</sub>O<sub>3</sub> composite coated negative electrode, (d) CF-MnO composite coated positive electrode.

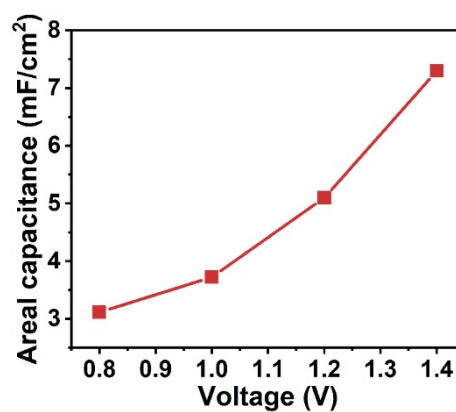

Figure S6: Areal capacitance of CF-MnO//CF-Fe<sub>2</sub>O<sub>3</sub> device calculated from the *CV* curves with varying voltage window from 0.8 to 1.4 V.

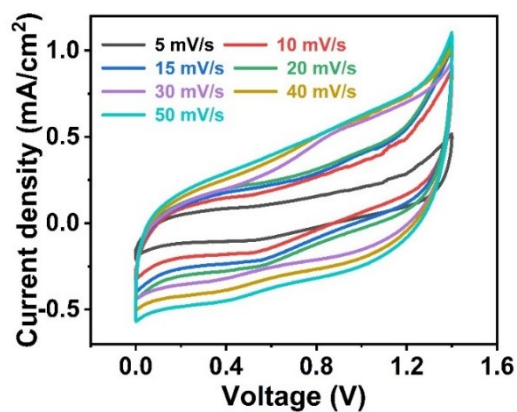

Figure S7:  $CV$  curves of asymmetric CF-MnO//CF-Fe<sub>2</sub>O<sub>3</sub> micro-supercapacitor at scan rates ranging from 5 to 50 mV/s.

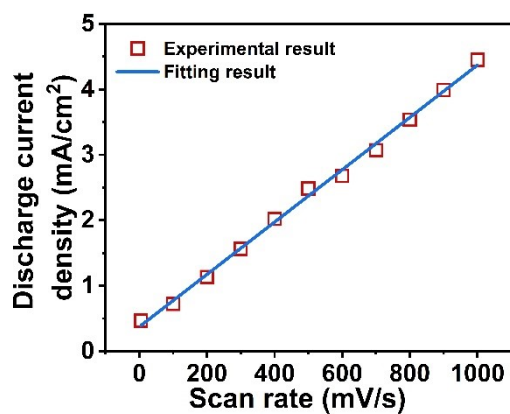

Figure S8: The discharge current density plotted with each corresponding scan rate of the CF-MnO//CF-Fe<sub>2</sub>O<sub>3</sub> device.

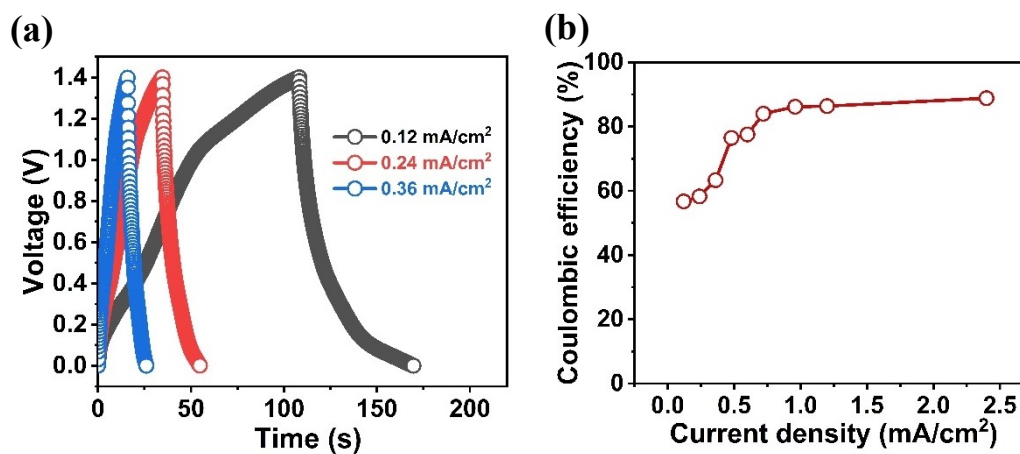

Figure S9: (a) Galvanometric charge-discharge curve for asymmetric micro-supercapacitor with various current densities. (b) Coulombic efficiency plotted against applied current densities.

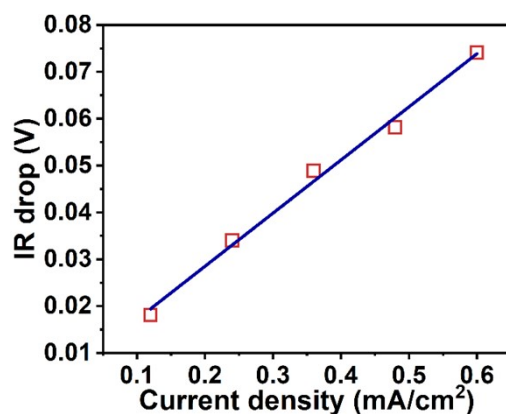

Figure S10: The voltage drop or IR drop plotted with each corresponding applied current density of the CF-MnO//CF-Fe<sub>2</sub>O<sub>3</sub> device.

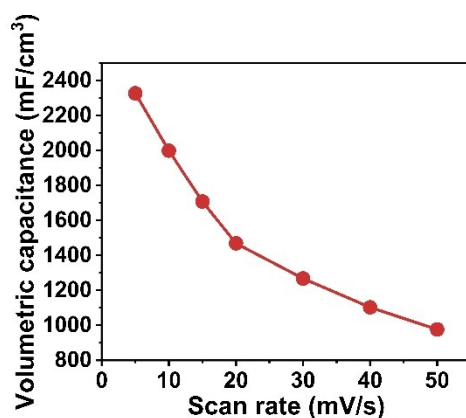

Figure S11: Volumetric capacitance of CF-MnO//CF-Fe<sub>2</sub>O<sub>3</sub> asymmetric micro-supercapacitor versus scan rate.



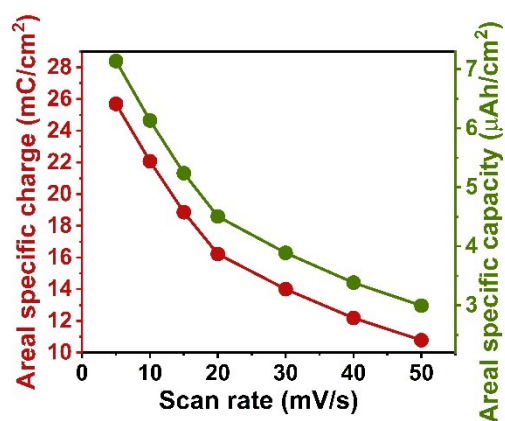

Figure S12: Areal specific charge and areal specific capacity versus scan rate of the asymmetric micro-supercapacitor.

Table S2: The areal specific capacitance versus applied current density of the asymmetric micro-supercapacitor.

| Current density (mA/cm <sup>2</sup> ) | Areal specific capacitance (mF/cm <sup>2</sup> )            |
|---------------------------------------|-------------------------------------------------------------|
|                                       | $C_A = \frac{2I \int V dt}{A \times V^2 \Big _{V_i}^{V_f}}$ |
| 0.12                                  | 2.24                                                        |
| 0.24                                  | 1.86                                                        |
| 0.36                                  | 1.62                                                        |
| 0.48                                  | 1.51                                                        |
| 0.60                                  | 1.43                                                        |
| 0.72                                  | 1.41                                                        |
| 0.96                                  | 1.34                                                        |
| 1.2                                   | 1.35                                                        |

Table S3: Comparison of equivalent series resistance ( $R_s$ ) with reported interdigitated asymmetric micro-supercapacitor.

| Asymmetric micro-supercapacitor structure | Equivalent series resistance ( $R_s$ ) | Ref       |
|-------------------------------------------|----------------------------------------|-----------|
| VN//MnO <sub>2</sub>                      | 70 $\Omega$                            | 1         |
| MnO <sub>2</sub> /MWNT//VWMWNT            | 42 $\Omega$                            | 2         |
| NiCoP@NiOOH//ZIF-C                        | 21.3 $\Omega$                          | 3         |
| PNG//PNG-MoO <sub>2</sub>                 | 55 $\Omega$                            | 4         |
| MXene//AC                                 | 15 $\Omega$                            | 5         |
| CF-MnO//CF-Fe <sub>2</sub> O <sub>3</sub> | 13.5 $\Omega$                          | This work |

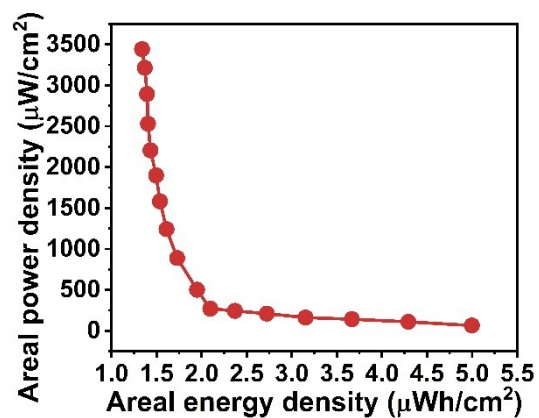

Figure S13: Ragone plot of the asymmetric micro-supercapacitor calculated from CV curves.

Table S4: The voltage excluding IR drop (V-IR) with each corresponding current density of the asymmetric micro-supercapacitor.

| <b>Current density<br/>mA/cm<sup>2</sup></b> | <b>V-IR<br/>V</b> |
|----------------------------------------------|-------------------|
| 0.12                                         | 1.382             |
| 0.24                                         | 1.367             |
| 0.36                                         | 1.351             |
| 0.48                                         | 1.342             |
| 0.60                                         | 1.326             |
| 0.72                                         | 1.325             |
| 0.96                                         | 1.333             |
| 1.2                                          | 1.314             |
| 2.4                                          | 1.269             |
| 3.6                                          | 1.273             |

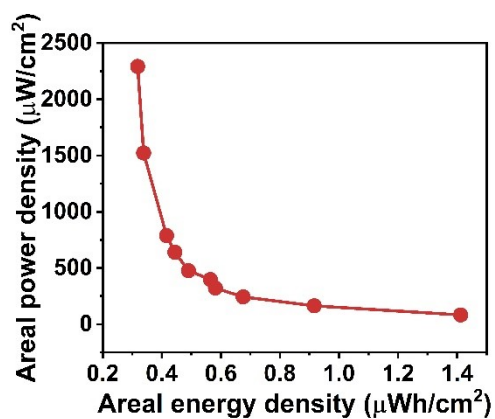

Figure S14: Ragone plot of the asymmetric micro-supercapacitor calculated from *CD* curves.

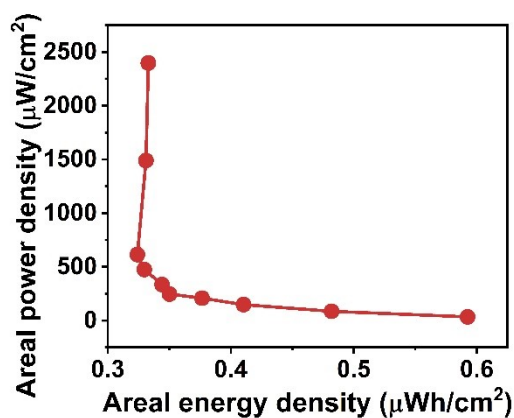

Figure S15: Ragone plot of the asymmetric micro-supercapacitor calculated from *CD* curves using integral formula.

Table S5: Comparison of capacitance retention with reported interdigitated asymmetric micro-supercapacitor.

| Asymmetric micro-supercapacitor structure                             | Electrolyte                                     | Retention (cycles) | Ref  |
|-----------------------------------------------------------------------|-------------------------------------------------|--------------------|------|
| Ti <sub>3</sub> C <sub>2</sub> T <sub>x</sub> //MnO <sub>2</sub> /PPy | PVA/H <sub>2</sub> SO <sub>4</sub>              | 80.7% (5000)       | 6    |
| MnO <sub>2</sub> // Fe <sub>2</sub> O <sub>3</sub>                    | 1 M KOH                                         | 80% (2,500)        | 7    |
| Ti <sub>3</sub> C <sub>2</sub> //MnO <sub>2</sub>                     | PVA/LiCl                                        | 87% (10000)        | 8    |
| MXene//AC                                                             | PVA/Na <sub>2</sub> SO <sub>4</sub>             | 91.4% (10000)      | 5    |
| PNG//PNG-MoO <sub>2</sub>                                             | PVA/LiCl                                        | 88% (10000)        | 4    |
| rGO//rGO/Mn <sub>3</sub> O <sub>4</sub>                               | PVA/LiCl                                        | 94% (3000)         | 9    |
| VO <sub>x</sub> /rGO//G-VNQDs/rGO                                     | PVA/LiCl                                        | 65% (8000)         | 10   |
| MnO <sub>2</sub> /MWNT//VWMWNT                                        | PMMA-PC-LiClO <sub>4</sub>                      | 86% (10000)        | 2    |
| NiCoP@NiOOH//ZIF-C                                                    | PVA/KOH                                         | 86% (8000)         | 3    |
| VN//MnO <sub>2</sub>                                                  | “Water-in-salt” gel<br>SiO <sub>2</sub> -LiTFSI | 90% (5000)         | 1    |
| CF-MnO//CF-Fe <sub>2</sub> O <sub>3</sub>                             | PVA-KOH                                         | 86% (10000)        | This |

|  |  |  |      |
|--|--|--|------|
|  |  |  | work |
|--|--|--|------|

## References:

- 1 J. Qin, S. Wang, F. Zhou, P. Das, S. Zheng, C. Sun, X. Bao and Z. S. Wu, *Energy Storage Mater.*, 2019, **18**, 397–404.
- 2 J. Yun, Y. Lim, H. Lee, G. Lee, H. Park, S. Y. Hong, S. W. Jin, Y. H. Lee, S. S. Lee and J. S. Ha, *Adv. Funct. Mater.*, 2017, **27**, 1–13.
- 3 M. Qiu, P. Sun, G. Cui, Y. Tong and W. Mai, *ACS Nano*, 2019, **13**, 8246–8255.
- 4 L. Zhang, Z. Chen, S. Zheng, S. Qin, J. Wang, C. Chen, D. Liu, L. Wang, G. Yang, Y. Su, Z. S. Wu, X. Bao, J. Razal and W. Lei, *J. Mater. Chem. A*, 2019, **7**, 14328–14336.
- 5 Y. Xie, H. Zhang, H. Huang, Z. Wang, Z. Xu, H. Zhao, Y. Wang, N. Chen and W. Yang, *Nano Energy*, 2020, **74**, 104928.
- 6 X. Li, Y. Ma, P. Shen, C. Zhang, M. Cao, S. Xiao, J. Yan, S. Luo and Y. Gao, *Adv. Mater. Technol.*, 2020, **5**, 1–8.
- 7 Z. Liu, X. Tian, X. Xu, L. He, M. Yan, C. Han, Y. Li, W. Yang and L. Mai, *Nano Res.*, 2017, **10**, 2471–2481.
- 8 F. Zhao, W. Liu, T. Qiu, W. Bin Gong, W. Ma, Q. Li, F. Li and F. Geng, *ACS Nano*, 2020, **14**, 603–610.
- 9 X. Wang, F. Wan, L. Zhang, Z. Zhao, Z. Niu and J. Chen, *Adv. Funct. Mater.*, 2018, **28**, 1–9.
- 10 K. Shen, J. Ding and S. Yang, *Adv. Energy Mater.*, 2018, **8**, 1–7.
